# Supplementary material
Source: Research Square preprint supplement (doi:10.21203/rs.3.rs-9791292/v1)
Supplement: Supplementary file 1 [file 85faaa472ef165afc3666684.xlsx]

## Sheet: KOJSKO (1st sampling)
Sample/Isolate ID	Number of nematodes	Method	Vineyard	Date of RNA extraction	Sample ID RT-PCR	Number of PCR reaction	Date of PCR	Result	GEL IMAGE									Folder/File name
Xi1	1	MagMAX	Kojsko	2024-08-21	RT-49-24	1942	2024-08-27	NEG										Xi1-Xi10
Xi2	1	MagMAX	Kojsko	2024-08-21	RT-50-24	1943	2024-08-27	NEG
Xi3	1	MagMAX	Kojsko	2024-08-21	RT-51-24	1944	2024-08-27	NEG
Xi4	1	MagMAX	Kojsko	2024-08-21	RT-52-24	1945	2024-08-27	NEG
Xi5	1	MagMAX	Kojsko	2024-08-21	RT-53-24	1946	2024-08-27	NEG
Xi6	1	MagMAX	Kojsko	2024-08-26	RT-54-24	1947	2024-08-27	NEG
Xi7	1	MagMAX	Kojsko	2024-08-26	RT-55-24	1948	2024-08-27	NEG
Xi8	1	MagMAX	Kojsko	2024-08-26	RT-56-24	1949	2024-08-27	NEG
Xi9	1	MagMAX	Kojsko	2024-08-26	RT-57-24	1950	2024-08-27	NEG
Xi10	1	MagMAX	Kojsko	2024-08-26	RT-58-24	1951	2024-08-27	NEG
Xi11	1	Direct RT-PCR	Kojsko	–	RT-99-24	1996	2024-09-13	NEG										Xi11-Xi20
Xi12	1	Direct RT-PCR	Kojsko	–	RT-100-24	1997	2024-09-13	NEG
Xi13	1	Direct RT-PCR	Kojsko	–	RT-101-24	1998	2024-09-13	NEG
Xi14	1	Direct RT-PCR	Kojsko	–	RT-102-24	1999	2024-09-13	NEG
Xi15	1	Direct RT-PCR	Kojsko	–	RT-103-24	2000	2024-09-13	NEG
Xi16	1	Direct RT-PCR	Kojsko	–	RT-104-24	2001	2024-09-13	NEG
Xi17	1	Direct RT-PCR	Kojsko	–	RT-105-24	2002	2024-09-13	NEG
Xi18	1	Direct RT-PCR	Kojsko	–	RT-106-24	2003	2024-09-13	NEG
Xi19	1	Direct RT-PCR	Kojsko	–	RT-107-24	2004	2024-09-13	NEG
Xi20	1	Direct RT-PCR	Kojsko	–	RT-108-24	2005	2024-09-13	NEG
Xi21	1	RNeasy	Kojsko	2024-11-13	RT-129-24	2065	2024-11-14	NEG										Xi21-Xi30
Xi22	1	RNeasy	Kojsko	2024-11-13	RT-130-24	2066	2024-11-14	NEG
Xi23	1	RNeasy	Kojsko	2024-11-13	RT-131-24	2067	2024-11-14	NEG
Xi24	1	RNeasy	Kojsko	2024-11-13	RT-132-24	2068	2024-11-14	NEG
Xi25	1	RNeasy	Kojsko	2024-11-13	RT-133-24	2069	2024-11-14	NEG
Xi26	1	RNeasy	Kojsko	2024-11-13	RT-134-24	2070	2024-11-14	NEG
Xi27	1	RNeasy	Kojsko	2024-11-13	RT-135-24	2071	2024-11-14	NEG
Xi28	1	RNeasy	Kojsko	2024-11-13	RT-136-24	2072	2024-11-14	NEG
Xi29	1	RNeasy	Kojsko	2024-11-13	RT-137-24	2073	2024-11-14	NEG
Xi30	1	RNeasy	Kojsko	2024-11-13	RT-138-24	2074	2024-11-14	NEG
Xi31	2	MagMAX	Kojsko	2024-08-29	RT-69-24	1962	2024-09-03	NEG										Xi31-Xi40
Xi32	2	MagMAX	Kojsko	2024-08-29	RT-70-24	1963	2024-09-03	NEG
Xi33	2	MagMAX	Kojsko	2024-08-29	RT-71-24	1964	2024-09-03	NEG
Xi34	2	MagMAX	Kojsko	2024-08-29	RT-72-24	1965	2024-09-03	NEG
Xi35	2	MagMAX	Kojsko	2024-08-29	RT-73-24	1966	2024-09-03	NEG
Xi36	2	MagMAX	Kojsko	2024-08-29	RT-74-24	1967	2024-09-03	NEG
Xi37	2	MagMAX	Kojsko	2024-08-29	RT-75-24	1968	2024-09-03	NEG
Xi38	2	MagMAX	Kojsko	2024-08-29	RT-76-24	1969	2024-09-03	NEG
Xi39	2	MagMAX	Kojsko	2024-08-29	RT-77-24	1970	2024-09-03	NEG
Xi40	2	MagMAX	Kojsko	2024-08-29	RT-78-24	1971	2024-09-03	NEG
Xi41	2	Direct RT-PCR	Kojsko	–	RT-89-24	1986	2024-09-12	NEG										Xi41-Xi50
Xi42	2	Direct RT-PCR	Kojsko	–	RT-90-24	1987	2024-09-12	NEG
Xi43	2	Direct RT-PCR	Kojsko	–	RT-91-24	1988	2024-09-12	NEG
Xi44	2	Direct RT-PCR	Kojsko	–	RT-92-24	1989	2024-09-12	NEG
Xi45	2	Direct RT-PCR	Kojsko	–	RT-93-24	1990	2024-09-12	NEG
Xi46	2	Direct RT-PCR	Kojsko	–	RT-94-24	1991	2024-09-12	NEG
Xi47	2	Direct RT-PCR	Kojsko	–	RT-95-24	1992	2024-09-12	NEG
Xi48	2	Direct RT-PCR	Kojsko	–	RT-96-24	1993	2024-09-12	NEG
Xi49	2	Direct RT-PCR	Kojsko	–	RT-97-24	1994	2024-09-12	NEG
Xi50	2	Direct RT-PCR	Kojsko	–	RT-98-24	1995	2024-09-12	NEG
Xi51	2	RNeasy	Kojsko	2024-10-18	RT-119-24	2056	2024-10-21	NEG										Xi51-Xi60
Xi52	2	RNeasy	Kojsko	2024-10-18	RT-120-24	2057	2024-10-21	NEG
Xi53	2	RNeasy	Kojsko	2024-10-18	RT-121-24	2058	2024-10-21	NEG
Xi54	2	RNeasy	Kojsko	2024-10-18	zlomilo se je pestalo, neuporaben vzorec
Xi55	2	RNeasy	Kojsko	2024-10-18	RT-122-24	2059	2024-10-21	NEG
Xi56	2	RNeasy	Kojsko	2024-10-18	RT-123-24	2060	2024-10-21	NEG
Xi57	2	RNeasy	Kojsko	2024-10-18	RT-124-24	2061	2024-10-21	NEG
Xi58	2	RNeasy	Kojsko	2024-10-18	RT-125-24	2062	2024-10-21	NEG
Xi59	2	RNeasy	Kojsko	2024-10-18	RT-126-24	2063	2024-10-21	NEG
Xi60	2	RNeasy	Kojsko	2024-10-18	RT-127-24	2064	2024-10-21	NEG
Xi61	5	MagMAX	Kojsko	2024-08-30	RT-59-24	1952	2024-09-02	NEG										Xi61-Xi70
Xi62	5	MagMAX	Kojsko	2024-08-30	RT-60-24	1953	2024-09-02	NEG
Xi63	5	MagMAX	Kojsko	2024-08-30	RT-61-24	1954	2024-09-02	NEG
Xi64	5	MagMAX	Kojsko	2024-08-30	RT-62-24	1955	2024-09-02	NEG
Xi65	5	MagMAX	Kojsko	2024-08-30	RT-63-24	1956	2024-09-02	NEG
Xi66	5	MagMAX	Kojsko	2024-08-30	RT-64-24	1957	2024-09-02	NEG
Xi67	5	MagMAX	Kojsko	2024-08-30	RT-65-24	1958	2024-09-02	NEG
Xi68	5	MagMAX	Kojsko	2024-08-30	RT-66-24	1959	2024-09-02	NEG
Xi69	5	MagMAX	Kojsko	2024-08-30	RT-67-24	1960	2024-09-02	NEG
Xi70	5	MagMAX	Kojsko	2024-08-30	RT-68-24	1961	2024-09-02	NEG
Xi71	5	Direct RT-PCR	Kojsko	–	RT-79-24	1972	2024-09-04	NEG										Xi71-Xi80
Xi72	5	Direct RT-PCR	Kojsko	–	RT-80-24	1973	2024-09-04	POZ
Xi73	5	Direct RT-PCR	Kojsko	–	RT-81-24	1974	2024-09-04	POZ
Xi74	5	Direct RT-PCR	Kojsko	–	RT-82-24	1975	2024-09-04	POZ
Xi75	5	Direct RT-PCR	Kojsko	–	RT-83-24	1976	2024-09-04	POZ
Xi76	5	Direct RT-PCR	Kojsko	–	RT-84-24	1977	2024-09-04	POZ
Xi77	5	Direct RT-PCR	Kojsko	–	RT-85-24	1978	2024-09-04	NEG
Xi78	5	Direct RT-PCR	Kojsko	–	RT-86-24	1979	2024-09-04	NEG
Xi79	5	Direct RT-PCR	Kojsko	–	RT-87-24	1980	2024-09-04	NEG
Xi80	5	Direct RT-PCR	Kojsko	–	RT-88-24	1981	2024-09-04	NEG
Xi81	5	RNeasy	Kojsko	2024-10-03	RT-109-24	2006	2024-10-04	NEG										Xi81-Xi90
Xi82	5	RNeasy	Kojsko	2024-10-03	RT-110-24	2007	2024-10-04	NEG
Xi83	5	RNeasy	Kojsko	2024-10-03	RT-111-24	2008	2024-10-04	NEG
Xi84	5	RNeasy	Kojsko	2024-10-03	RT-112-24	2009	2024-10-04	NEG
Xi85	5	RNeasy	Kojsko	2024-10-03	RT-113-24	2010	2024-10-04	NEG
Xi86	5	RNeasy	Kojsko	2024-10-03	RT-114-24	2011	2024-10-04	NEG
Xi87	5	RNeasy	Kojsko	2024-10-03	RT-115-24	2012	2024-10-04	NEG
Xi88	5	RNeasy	Kojsko	2024-10-03	RT-116-24	2013	2024-10-04	POZ
Xi89	5	RNeasy	Kojsko	2024-10-03	RT-117-24	2014	2024-10-04	NEG
Xi90	5	RNeasy	Kojsko	2024-10-03	RT-118-24	2015	2024-10-04	NEG

## Sheet: TOMAJ
Sample/Isolate ID	Number of nematodes	Method	Vineyard	Date of RNA extraction	Sample ID RT-PCR	Number of PCR reaction	Date of PCR	Result	GEL IMAGE									Folder/File name
Xi100	1	MagMAX	Tomaj	2025-04-15	RT-11-25	2086	2025-04-28	NEG										Xi100-Xi109 and Xi120-Xi129
Xi101	1	MagMAX	Tomaj	2025-04-15	RT-12-25	2087	2025-04-28	NEG
Xi102	1	MagMAX	Tomaj	2025-04-15	RT-13-25	2088	2025-04-28	NEG
Xi103	1	MagMAX	Tomaj	2025-04-15	RT-14-25	2089	2025-04-28	NEG
Xi104	1	MagMAX	Tomaj	2025-04-15	RT-15-25	2090	2025-04-28	POZ
Xi105	1	MagMAX	Tomaj	2025-04-15	RT-16-25	2091	2025-04-28	NEG
Xi106	1	MagMAX	Tomaj	2025-04-15	RT-17-25	2092	2025-04-28	NEG
Xi107	1	MagMAX	Tomaj	2025-04-15	RT-18-25	2093	2025-04-28	POZ
Xi108	1	MagMAX	Tomaj	2025-04-15	RT-19-25	2094	2025-04-28	POZ
Xi109	1	MagMAX	Tomaj	2025-04-15	RT-20-25	2095	2025-04-28	POZ
Xi110	1	Direct RT-PCR	Tomaj	–	RT-71-25	2146	2025-05-14	NEG										Xi110-Xi119 and Xi140-Xi149
Xi111	1	Direct RT-PCR	Tomaj	–	RT-72-25	2147	2025-05-14	NEG
Xi112	1	Direct RT-PCR	Tomaj	–	RT-73-25	2148	2025-05-14	NEG
Xi113	1	Direct RT-PCR	Tomaj	–	RT-74-25	2149	2025-05-14	NEG
Xi114	1	Direct RT-PCR	Tomaj	–	RT-75-25	2150	2025-05-14	NEG
Xi115	1	Direct RT-PCR	Tomaj	–	RT-76-25	2151	2025-05-14	NEG
Xi116	1	Direct RT-PCR	Tomaj	–	RT-77-25	2152	2025-05-14	POZ
Xi117	1	Direct RT-PCR	Tomaj	–	RT-78-25	2153	2025-05-14	NEG
Xi118	1	Direct RT-PCR	Tomaj	–	RT-79-25	2154	2025-05-14	NEG
Xi119	1	Direct RT-PCR	Tomaj	–	RT-80-25	2155	2025-05-14	NEG
Xi120	1	RNeasy	Tomaj	2025-04-18	RT-21-25	2096	2025-04-28	POZ										Xi100-Xi109 and Xi120-Xi129
Xi121	1	RNeasy	Tomaj	2025-04-18	RT-22-25	2097	2025-04-28	POZ
Xi122	1	RNeasy	Tomaj	2025-04-18	RT-23-25	2098	2025-04-28	POZ
Xi123	1	RNeasy	Tomaj	2025-04-18	RT-24-25	2099	2025-04-28	POZ
Xi124	1	RNeasy	Tomaj	2025-04-18	RT-25-25	2100	2025-04-28	POZ
Xi125	1	RNeasy	Tomaj	2025-04-18	RT-26-25	2101	2025-04-28	NEG
Xi126	1	RNeasy	Tomaj	2025-04-18	RT-27-25	2102	2025-04-28	POZ
Xi127	1	RNeasy	Tomaj	2025-04-18	RT-28-25	2103	2025-04-28	POZ
Xi128	1	RNeasy	Tomaj	2025-04-18	RT-29-25	2104	2025-04-28	NEG
Xi129	1	RNeasy	Tomaj	2025-04-18	RT-30-25	2105	2025-04-29	POZ
Xi130	2	MagMAX	Tomaj	2025-04-17	RT-31-25	2106	2025-04-29	NEG										Xi130-Xi139 and Xi150-Xi159
Xi131	2	MagMAX	Tomaj	2025-04-17	RT-32-25	2107	2025-04-29	POZ
Xi132	2	MagMAX	Tomaj	2025-04-17	RT-33-25	2108	2025-04-29	NEG
Xi133	2	MagMAX	Tomaj	2025-04-17	RT-34-25	2109	2025-04-29	NEG
Xi134	2	MagMAX	Tomaj	2025-04-17	RT-35-25	2110	2025-04-29	POZ
Xi135	2	MagMAX	Tomaj	2025-04-17	RT-36-25	2111	2025-04-29	POZ
Xi136	2	MagMAX	Tomaj	2025-04-17	RT-37-25	2112	2025-04-29	NEG
Xi137	2	MagMAX	Tomaj	2025-04-17	RT-38-25	2113	2025-04-29	POZ
Xi138	2	MagMAX	Tomaj	2025-04-17	RT-39-25	2114	2025-04-29	NEG
Xi139	2	MagMAX	Tomaj	2025-04-17	RT-40-25	2115	2025-04-29	NEG
Xi140	2	Direct RT-PCR	Tomaj	–	RT-81-25	2156	2025-05-14	POZ										Xi110-Xi119 and Xi140-Xi149
Xi141	2	Direct RT-PCR	Tomaj	–	RT-82-25	2157	2025-05-14	POZ
Xi142	2	Direct RT-PCR	Tomaj	–	RT-83-25	2158	2025-05-14	NEG
Xi143	2	Direct RT-PCR	Tomaj	–	RT-84-25	2159	2025-05-14	NEG
Xi144	2	Direct RT-PCR	Tomaj	–	RT-85-25	2160	2025-05-14	NEG
Xi145	2	Direct RT-PCR	Tomaj	–	RT-86-25	2161	2025-05-14	NEG
Xi146	2	Direct RT-PCR	Tomaj	–	RT-87-25	2162	2025-05-14	NEG
Xi147	2	Direct RT-PCR	Tomaj	–	RT-88-25	2163	2025-05-14	NEG
Xi148	2	Direct RT-PCR	Tomaj	–	RT-89-25	2164	2025-05-14	NEG
Xi149	2	Direct RT-PCR	Tomaj	–	RT-90-25	2165	2025-05-14	POZ
Xi150	2	RNeasy	Tomaj	2025-04-24	RT-41-25	2116	2025-04-29	POZ										Xi130-Xi139 and Xi150-Xi159
Xi151	2	RNeasy	Tomaj	2025-04-24	RT-42-25	2117	2025-04-29	POZ
Xi152	2	RNeasy	Tomaj	2025-04-24	RT-43-25	2118	2025-04-29	POZ
Xi153	2	RNeasy	Tomaj	2025-04-24	RT-44-25	2119	2025-04-29	POZ
Xi154	2	RNeasy	Tomaj	2025-04-24	RT-45-25	2120	2025-04-29	POZ
Xi155	2	RNeasy	Tomaj	2025-04-24	RT-46-25	2121	2025-04-29	POZ
Xi156	2	RNeasy	Tomaj	2025-04-24	RT-47-25	2122	2025-04-29	POZ
Xi157	2	RNeasy	Tomaj	2025-04-24	RT-48-25	2123	2025-04-29	POZ
Xi158	2	RNeasy	Tomaj	2025-04-24	RT-49-25	2124	2025-04-29	POZ
Xi159	2	RNeasy	Tomaj	2025-04-24	RT-50-25	2125	2025-04-29	POZ
Xi160	5	MagMAX	Tomaj	2025-04-17	RT-51-25	2126	2025-04-29	POZ										Xi160-Xi169 and Xi180-Xi189
Xi161	5	MagMAX	Tomaj	2025-04-17	RT-52-25	2127	2025-04-29	POZ
Xi162	5	MagMAX	Tomaj	2025-04-17	RT-53-25	2128	2025-04-29	POZ
Xi163	5	MagMAX	Tomaj	2025-04-17	RT-54-25	2129	2025-04-29	NEG
Xi164	5	MagMAX	Tomaj	2025-04-17	RT-55-25	2130	2025-04-29	POZ
Xi165	5	MagMAX	Tomaj	2025-04-17	RT-56-25	2131	2025-04-29	NEG
Xi166	5	MagMAX	Tomaj	2025-04-17	RT-57-25	2132	2025-04-29	POZ
Xi167	5	MagMAX	Tomaj	2025-04-17	RT-58-25	2133	2025-04-29	POZ
Xi168	5	MagMAX	Tomaj	2025-04-17	RT-59-25	2134	2025-04-29	NEG
Xi169	5	MagMAX	Tomaj	2025-04-17	RT-60-25	2135	2025-04-29	POZ
Xi170	5	Direct RT-PCR	Tomaj	–	RT-91-25	2166	2025-05-14	NEG										Xi170-Xi179
Xi171	5	Direct RT-PCR	Tomaj	–	RT-92-25	2167	2025-05-14	POZ
Xi172	5	Direct RT-PCR	Tomaj	–	RT-93-25	2168	2025-05-14	POZ
Xi173	5	Direct RT-PCR	Tomaj	–	RT-94-25	2169	2025-05-14	POZ
Xi174	5	Direct RT-PCR	Tomaj	–	RT-95-25	2170	2025-05-14	POZ
Xi175	5	Direct RT-PCR	Tomaj	–	RT-96-25	2171	2025-05-14	POZ
Xi176	5	Direct RT-PCR	Tomaj	–	RT-97-25	2172	2025-05-14	POZ
Xi177	5	Direct RT-PCR	Tomaj	–	RT-98-25	2173	2025-05-14	POZ
Xi178	5	Direct RT-PCR	Tomaj	–	RT-99-25	2174	2025-05-14	POZ
Xi179	5	Direct RT-PCR	Tomaj	–	RT-100-25	2175	2025-05-14	NEG
Xi180	5	RNeasy	Tomaj	2025-04-25	RT-61-25	2136	2025-04-29	POZ										Xi160-Xi169 and Xi180-Xi189
Xi181	5	RNeasy	Tomaj	2025-04-25	RT-62-25	2137	2025-04-29	POZ
Xi182	5	RNeasy	Tomaj	2025-04-25	RT-63-25	2138	2025-04-29	POZ
Xi183	5	RNeasy	Tomaj	2025-04-25	RT-64-25	2139	2025-04-29	POZ
Xi184	5	RNeasy	Tomaj	2025-04-25	RT-65-25	2140	2025-04-29	POZ
Xi185	5	RNeasy	Tomaj	2025-04-25	RT-66-25	2141	2025-04-29	POZ
Xi186	5	RNeasy	Tomaj	2025-04-25	RT-67-25	2142	2025-04-29	POZ
Xi187	5	RNeasy	Tomaj	2025-04-25	RT-68-25	2143	2025-04-29	POZ
Xi188	5	RNeasy	Tomaj	2025-04-25	RT-69-25	2144	2025-04-29	POZ
Xi189	5	RNeasy	Tomaj	2025-04-25	RT-70-25	2145	2025-04-29	POZ
Xi348	2	Brief heat treatment	Tomaj	–	RT-167-25	2244	2025-12-17	NEG										Xi348-Xi357
Xi349	2	Brief heat treatment	Tomaj	–	RT-168-25	2245	2025-12-17	POZ
Xi350	2	Brief heat treatment	Tomaj	–	RT-169-25	2246	2025-12-17	POZ
Xi351	2	Brief heat treatment	Tomaj	–	RT-170-25	2247	2025-12-17	NEG
Xi352	2	Brief heat treatment	Tomaj	–	RT-171-25	2248	2025-12-17	NEG
Xi353	2	Brief heat treatment	Tomaj	–	RT-172-25	2249	2025-12-17	POZ
Xi354	2	Brief heat treatment	Tomaj	–	RT-173-25	2250	2025-12-17	POZ
Xi355	2	Brief heat treatment	Tomaj	–	RT-174-25	2251	2025-12-17	NEG
Xi356	2	Brief heat treatment	Tomaj	–	RT-175-25	2252	2025-12-17	POZ
Xi357	2	Brief heat treatment	Tomaj	–	RT-176-25	2253	2025-12-17	NEG

## Sheet: HRUŠEVICA
Sample/Isolate ID	Number of nematodes	Method	Vineyard	Date of RNA extraction	Sample ID RT-PCR	Number of PCR reaction	Date of PCR	Result	GEL IMAGE									Folder/File name
Xi190	1	RNeasy	Hruševica	2025-07-29	RT-101-25	2176	2025-07-31	POZ										Xi190-Xi199
Xi191	1	RNeasy	Hruševica	2025-07-29	RT-102-25	2177	2025-07-31	POZ
Xi192	1	RNeasy	Hruševica	2025-07-29	RT-103-25	2178	2025-07-31	POZ
Xi193	1	RNeasy	Hruševica	2025-07-29	RT-104-25	2179	2025-07-31	POZ
Xi194	1	RNeasy	Hruševica	2025-07-29	RT-105-25	2180	2025-07-31	POZ
Xi195	1	RNeasy	Hruševica	2025-07-29	RT-106-25	2181	2025-07-31	POZ
Xi196	1	RNeasy	Hruševica	2025-07-30	RT-107-25	2182	2025-07-31	NEG
Xi197	1	RNeasy	Hruševica	2025-07-30	RT-108-25	2183	2025-07-31	POZ
Xi198	1	RNeasy	Hruševica	2025-07-30	RT-109-25	2184	2025-07-31	NEG
Xi199	1	RNeasy	Hruševica	2025-07-30	RT-110-25	2185	2025-07-31	POZ
Xi200	2	RNeasy	Hruševica	2025-07-30	RT-111-25	2186	2025-08-26	POZ										Xi200-Xi209
Xi201	2	RNeasy	Hruševica	2025-07-30	RT-112-25	2187	2025-08-26	POZ
Xi202	2	RNeasy	Hruševica	2025-08-20	RT-113-25	2188	2025-08-26	POZ
Xi203	2	RNeasy	Hruševica	2025-08-20	RT-114-25	2189	2025-08-26	POZ
Xi204	2	RNeasy	Hruševica	2025-08-20	RT-115-25	2190	2025-08-26	POZ
Xi205	2	RNeasy	Hruševica	2025-08-20	RT-116-25	2191	2025-08-26	POZ
Xi206	2	RNeasy	Hruševica	2025-08-20	RT-117-25	2192	2025-08-26	POZ
Xi207	2	RNeasy	Hruševica	2025-08-20	RT-118-25	2193	2025-08-26	POZ
Xi208	2	RNeasy	Hruševica	2025-08-20	RT-119-25	2194	2025-08-26	POZ
Xi209	2	RNeasy	Hruševica	2025-08-20	RT-120-25	2195	2025-08-26	POZ

## Sheet: KOJSKO (2nd sampling)
Sample/Isolate ID	Number of nematodes	Method	Vineyard	Row/vine	Date of RNA extraction	Sample ID RT-PCR	Number of PCR reaction	Date of PCR	Result	GEL IMAGE									Folder/File name
Xi210	1	RNeasy	Kojsko	17/44	2025-08-20	RT-121-25	2196	2025-08-26	POZ										Xi210-Xi229
Xi211	1	RNeasy	Kojsko	17/38	2025-08-20	RT-122-25	2197	2025-08-26	POZ
Xi212	1	RNeasy	Kojsko	17/56	2025-08-20	RT-123-25	2198	2025-08-26	NEG
Xi213	1	RNeasy	Kojsko	17/42	2025-08-20	RT-124-25	2199	2025-08-26	POZ
Xi214	1	RNeasy	Kojsko	17/33	2025-08-21	RT-125-25	2200	2025-08-26	POZ
Xi215	1	RNeasy	Kojsko	17/58	2025-08-21	RT-126-25	2201	2025-08-26	POZ
Xi216	1	RNeasy	Kojsko	17/46	2025-08-21	RT-127-25	2202	2025-08-26	POZ
Xi217	1	RNeasy	Kojsko	17/49	2025-08-21	RT-128-25	2203	2025-08-26	POZ
Xi218	1	RNeasy	Kojsko	17/32	2025-08-21	RT-129-25	2204	2025-08-26	POZ
Xi219	1	RNeasy	Kojsko	17/24	2025-08-21	RT-130-25	2205	2025-08-26	POZ
Xi220	2	RNeasy	Kojsko	17/44	2025-08-21	RT-131-25	2206	2025-08-26	POZ										Xi210-Xi229
Xi221	2	RNeasy	Kojsko	17/38	2025-08-21	RT-132-25	2207	2025-08-26	POZ
Xi222	2	RNeasy	Kojsko	17/57	2025-08-22	RT-133-25	2208	2025-08-26	POZ
Xi223	2	RNeasy	Kojsko	17/25	2025-08-22	RT-134-25	2209	2025-08-26	POZ
Xi224	2	RNeasy	Kojsko	17/26	2025-08-22	RT-135-25	2210	2025-08-26	POZ
Xi225	2	RNeasy	Kojsko	17/27	2025-08-22	RT-136-25	2211	2025-08-26	NEG
Xi226	2	RNeasy	Kojsko	17/30	2025-08-22	RT-137-25	2212	2025-08-26	POZ
Xi227	2	RNeasy	Kojsko	17/45	2025-08-22	RT-138-25	2213	2025-08-26	POZ
Xi228	2	RNeasy	Kojsko	17/42	2025-08-22	RT-139-25	2214	2025-08-26	POZ
Xi229	2	RNeasy	Kojsko	17/58	2025-08-22	RT-140-25	2215	2025-08-26	NEG
